# Supplementary material for: Machine Learning-Based Multi-Level Fusion Framework for a Hybrid Voltammetric and Impedimetric Metal Ions Electronic Tongue
Source: MDPI journal article supplement (doi:10.3390/chemosensors10110474), 2022-11-12
Supplement: s1 [file s1]

Archive with 1 entries (1 files):
- chemosensors-1998427-supplementary.pdf
